# Supplementary material for: Development of high performance dental resin composites with outstanding antibacterial activity, high mechanical properties and low polymerization shrinkage based on a SiO2 hybridized tetrapod-like zinc oxide whisker with CC bonds
Source: Royal Society of Chemistry journal article supplement (doi:10.1039/c6ra13498j), 2016-01-01
Supplement: c6ra13498j1.pdf [file c6ra13498j1.pdf]

**Electronic supplementary information (ESI)**

**Development of high performance dental resin composites with outstanding antibacterial activity, high mechanical properties and low polymerization shrinkage based on SiO<sub>2</sub> hybridized tetrapod-like zinc oxide whisker with C=C bonds**

Meng Shen, Guozheng Liang\*, Aijuan Gu\* and Li Yuan

Table S1 Compositions of typical DRCs since 2013

| Ref. | Filler                                     | Filler content (wt%) | Polymerization shrinkage (%) | Decreasing degree of shrinkage (%) |
|------|--------------------------------------------|----------------------|------------------------------|------------------------------------|
| [1]  | $\gamma$ -MPS treated barium glass surface | 40                   | 5.0                          | 23                                 |
| [2]  | Crosslinked polymer nanoparticles          | 25                   | 4.9                          | 30                                 |
| [3]  | Hydroxyapatite whisker                     | 48                   | 5.0                          | —*                                 |

\* No datum available

**References**

- 1 P. K. Shah and J. W. Stansbury, *Dent. Mater.*, 2014, 30, 586-593.
- 2 M. Szaloki, J. Gall, K. Bukovinszki, J. Borbely and C. Hegedus, *React. Funct. Polym.*, 2013, 73, 465-473.
- 3 F. Liu, R. Wang, Y. Cheng, X. Jiang, Q. Zhang and M. Zhu, *Mater. Sci. Eng. C*, 2013, 33, 4994-5000.

\*Corresponding author, Tel: +86 512 65880967. Fax: +86 512 65880089. E-mail address: lgzheng@suda.edu.cn, or ajgu@suda.edu.cn
